# Supplementary material for: Associations between air pollution and mental health service use in dementia: a retrospective cohort study
Source: HighWire-hosted journal article supplement (doi:10.1136/bmjment-2023-300762), 2023-07-01
Supplement: bmjment-2023-300762supp001_data_supplement.pdf [file bmjment-2023-300762supp001_data_supplement.pdf]

## Supplementary Material

Amy Ronaldson, Robert Stewart, Christoph Mueller, Jayati Das-Munshi, Joanne B. Newbury, Ian Mudway, Matthew Broadbent, Helen L. Fisher, Sean Beevers, David Dajnak, Matthew Hotopf, Stephani L. Hatch, Ioannis Bakolis

### **Association between air pollution exposure and mental health service use in dementia: A retrospective cohort study**

#### Contents

|                                                                                                                                                                                                                                   |                |
|-----------------------------------------------------------------------------------------------------------------------------------------------------------------------------------------------------------------------------------|----------------|
| Supplementary Methods                                                                                                                                                                                                             | <b>p.2</b>     |
| <b>Figure S1.</b> Sample selection flowchart                                                                                                                                                                                      | <b>p.3</b>     |
| <b>Figure S2.</b> Associations between PM <sub>2.5</sub> , PM <sub>10</sub> , and HoNOS65+ subscales                                                                                                                              | <b>p.4</b>     |
| <b>Table S1.</b> Associations between air pollution and CMHT events at 1-, 5-, and 9-years in patients with dementia                                                                                                              | <b>p.5-6</b>   |
| <b>Table S2a-S2c.</b> E-values                                                                                                                                                                                                    | <b>p.7-12</b>  |
| <b>Table S3.</b> Population attributable fractions (PAF) and relative risk calculations associated with current versus counterfactual air pollution exposure                                                                      | <b>p.13</b>    |
| <b>Table S4.</b> Fully adjusted associations between air pollutants and HoNOS65+ items at Year 1                                                                                                                                  | <b>p.14</b>    |
| <b>Table S5.</b> Difference between analytical and excluded samples                                                                                                                                                               | <b>p.15</b>    |
| <b>Table S6.</b> Examining the impact of missing data by assessing associations between air pollution and CMHT events at 1-, 5-, and 9-years in patients with dementia using multiple imputation by chained equations             | <b>p.16-17</b> |
| <b>Table S7.</b> To examine whether associations between air pollution exposure and number of CMHT events were modified by neighbourhood deprivation we included an interaction term with IMD in fully adjusted regression models | <b>p.18</b>    |
| <b>Table S8.</b> To examine whether associations between air pollution exposure and number of CMHT events were modified by borough we included an interaction term with borough in fully adjusted regression models (             | <b>p.19</b>    |
| <b>Table S9.</b> Associations between air pollution and CMHT events stratified by residential Borough                                                                                                                             | <b>p.20</b>    |
| <b>Table S10.</b> Two-pollutant models of the association between air pollution exposure and number of CMHT events                                                                                                                | <b>p.21</b>    |
| <b>Table S11.</b> Correlation matrix of measures of air pollution                                                                                                                                                                 | <b>p.22</b>    |
| <b>Table S12.</b> Associations between air pollution exposure and number of CMHT events clustered by LSOA                                                                                                                         | <b>p.23</b>    |
| <b>References</b>                                                                                                                                                                                                                 | <b>p.24</b>    |

## Supplementary Methods

*Multiple imputation by chained equations.* Complete case analyses were conducted on people with dementia without missing covariate data in Model 3 (N=5024). Multiple imputation by chained equations (MICE) was then performed for these missing covariate data within Stata v15.1 (“mi impute chained”) for all patients with valid postcode information who resided in the four-borough catchment area, had air pollution data available (N=866 observations dropped), and who were aged  $\geq 65$  years at first face-to-face contact (N=304 observations dropped) leading to a sample of 5272. 4.7% (N=248) of the sample had missing covariate data in Model 3. Imputations were performed for all analysis variables with missing values: ethnicity and social fragmentation. For imputations, ethnicity was specified as multinomial using “mlogit”, and social fragmentation was specified as continuous using “regress”. Variables with no missing values were included in MICE, including quarterly measures of NO<sub>2</sub>, PM<sub>2.5</sub>, and PM<sub>10</sub>, CMHT events at Year 1, 5, and 9, active SLaM days, year of first face-to-face contact, season of first face-to-face contact, age at first face-to-face contact, gender, marital status, number of mental health comorbidities, Index of Multiple Deprivation (IMD), and population density. We imputed 5 datasets using a random seed of 1234. There were 66 values and 185 values imputed for ethnicity and social fragmentation, respectively.

*Population attributable fractions.* Population attributable fractions (PAFs) were calculated using formulae detailed in Braithwaite et al. (2019) [1] for two separate exposure scenarios – London, and UK urban traffic areas. We assumed causality and a log-linear exposure-response function (i.e. that relative risk remains constant per unit increase in exposure at all concentrations) [2]. We estimated PAFs by assuming 100% exposure prevalence at a population-weighted annual mean of PM<sub>2.5</sub> and NO<sub>2</sub> exposure levels for London (2019) [3] and UK urban traffic areas (2021) [4]. The counterfactual scenarios we used were the World Health Organisation’s (WHO) recommended limit for annual mean PM<sub>2.5</sub> (5 $\mu\text{g}/\text{m}^3$ ) and NO<sub>2</sub> (10 $\mu\text{g}/\text{m}^3$ ) [5]. As strongest associations were observed between air pollution and CMHT events at Year 1, we used fully adjusted data (model 3) from this timepoint to calculate PAFs. We selected PM<sub>2.5</sub> and NO<sub>2</sub> as these were most consistently associated with CMHT events at all timepoints.

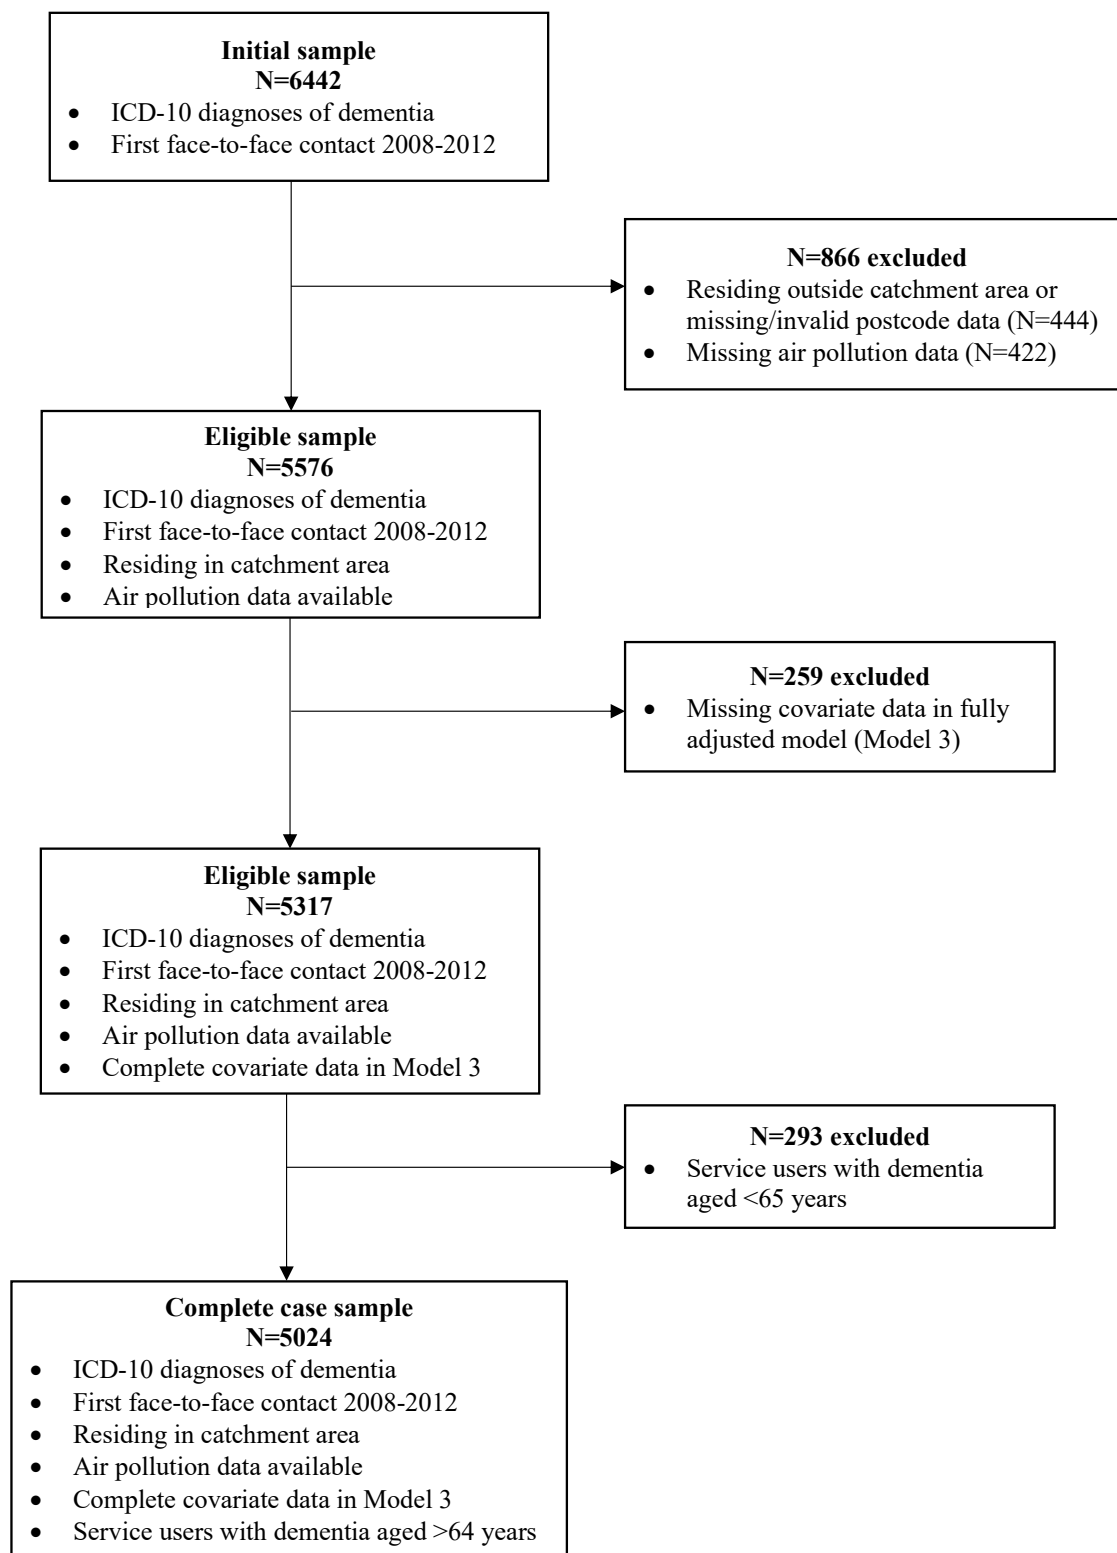

**Figure S1.** Sample selection flowchart

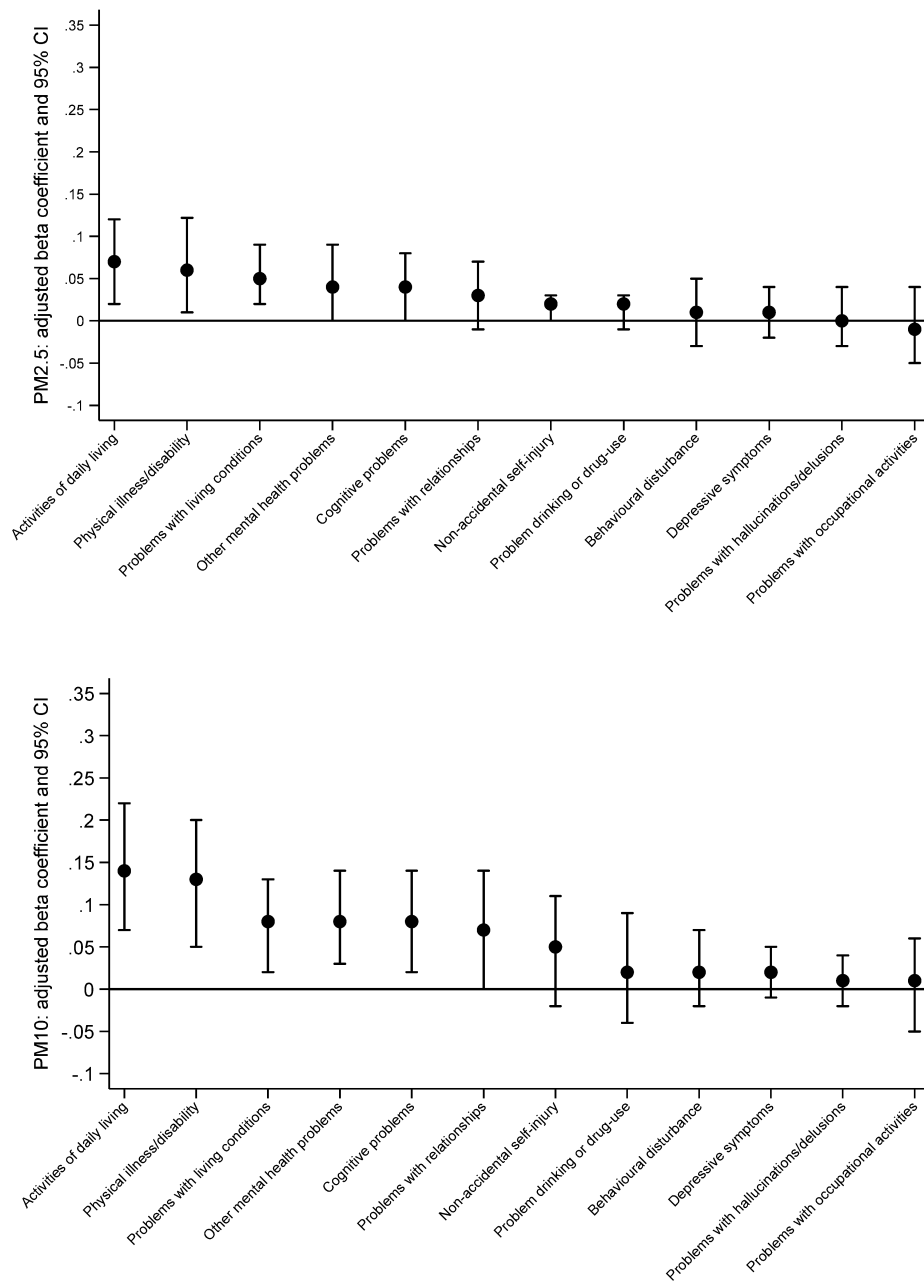

**Figure S2.** Adjusted beta coefficients and their corresponding 95% confidence intervals (CI) from logistic regressions examining associations between PM<sub>2.5</sub> (upper panel) and PM<sub>10</sub> (lower panel) exposure and scores on individual HoNOS65+ subscales within 12 months of first face-to-face contact with SLaM services. All models are adjusted for season, year, age, sex, ethnicity, marital status, number of comorbid mental health conditions, neighbourhood deprivation, social fragmentation, and population density.

**Table S1.** Associations between air pollution and CMHT events at 1-, 5-, and 9-years in patients with dementia (N=5024)

| <b>1-year follow-up</b>       |                            |                  |                            |                  |                            |                  |
|-------------------------------|----------------------------|------------------|----------------------------|------------------|----------------------------|------------------|
|                               | Model 1                    |                  | Model 2                    |                  | Model 3                    |                  |
|                               | <i>IRR (95% CI)</i>        | <i>P value</i>   | <i>IRR (95% CI)</i>        | <i>P value</i>   | <i>IRR (95% CI)</i>        | <i>P value</i>   |
| <b>NO<sub>2</sub></b>         |                            |                  |                            |                  |                            |                  |
| 1                             | Reference                  |                  | Reference                  |                  | Reference                  |                  |
| 2                             | 1.18 (1.10 to 1.28)        | <0.001           | 1.18 (1.09 to 1.27)        | <0.001           | 1.09 (1.01 to 1.18)        | 0.030            |
| 3                             | 1.34 (1.21 to 1.48)        | <0.001           | 1.31 (1.19 to 1.45)        | <0.001           | 1.15 (1.03 to 1.29)        | 0.010            |
| 4                             | 1.61 (1.44 to 1.80)        | <0.001           | 1.53 (1.37 to 1.71)        | <0.001           | 1.27 (1.11 to 1.45)        | 0.001            |
| <i>NO<sub>2</sub> (IQR)</i>   | <i>1.35 (1.27 to 1.44)</i> | <i>&lt;0.001</i> | <i>1.31 (1.23 to 1.40)</i> | <i>&lt;0.001</i> | <i>1.18 (1.09 to 1.28)</i> | <i>&lt;0.001</i> |
| <b>PM<sub>2.5</sub></b>       |                            |                  |                            |                  |                            |                  |
| 1                             | Reference                  |                  | Reference                  |                  | Reference                  |                  |
| 2                             | 1.15 (1.04 to 1.28)        | 0.007            | 1.13 (1.02 to 1.25)        | 0.020            | 1.07 (0.97 to 1.19)        | 0.177            |
| 3                             | 1.27 (1.12 to 1.43)        | <0.001           | 1.26 (1.12 to 1.42)        | <0.001           | 1.14 (1.01 to 1.29)        | 0.032            |
| 4                             | 1.54 (1.35 to 1.77)        | <0.001           | 1.50 (1.31 to 1.72)        | <0.001           | 1.33 (1.16 to 1.53)        | <0.001           |
| <i>PM<sub>2.5</sub> (IQR)</i> | <i>1.16 (1.11 to 1.21)</i> | <i>&lt;0.001</i> | <i>1.15 (1.10 to 1.20)</i> | <i>&lt;0.001</i> | <i>1.11 (1.06 to 1.16)</i> | <i>&lt;0.001</i> |
| <b>PM<sub>10</sub></b>        |                            |                  |                            |                  |                            |                  |
| 1                             | Reference                  |                  | Reference                  |                  | Reference                  |                  |
| 2                             | 1.07 (0.98 to 1.17)        | 0.123            | 1.04 (0.96 to 1.14)        | 0.305            | 1.01 (0.93 to 1.10)        | 0.773            |
| 3                             | 1.22 (1.09 to 1.36)        | <0.001           | 1.18 (1.06 to 1.32)        | 0.002            | 1.09 (0.98 to 1.22)        | 0.115            |
| 4                             | 1.49 (1.32 to 1.69)        | <0.001           | 1.43 (1.26 to 1.61)        | <0.001           | 1.26 (1.10 to 1.43)        | <0.001           |
| <i>PM<sub>10</sub> (IQR)</i>  | <i>1.25 (1.17 to 1.33)</i> | <i>&lt;0.001</i> | <i>1.22 (1.15 to 1.30)</i> | <i>&lt;0.001</i> | <i>1.15 (1.07 to 1.22)</i> | <i>&lt;0.001</i> |
| <b>5-year follow-up</b>       |                            |                  |                            |                  |                            |                  |
|                               | Model 1                    |                  | Model 2                    |                  | Model 3                    |                  |
|                               | <i>IRR (95% CI)</i>        | <i>P value</i>   | <i>IRR (95% CI)</i>        | <i>P value</i>   | <i>IRR (95% CI)</i>        | <i>P value</i>   |
| <b>NO<sub>2</sub></b>         |                            |                  |                            |                  |                            |                  |
| 1                             | Reference                  |                  | Reference                  |                  | Reference                  |                  |
| 2                             | 1.12 (1.01 to 1.24)        | 0.030            | 1.10 (1.00 to 1.22)        | 0.060            | 1.01 (0.91 to 1.13)        | 0.781            |
| 3                             | 1.67 (1.45 to 1.91)        | <0.001           | 1.55 (1.35 to 1.77)        | <0.001           | 1.35 (1.16 to 1.57)        | <0.001           |
| 4                             | 1.85 (1.59 to 2.16)        | <0.001           | 1.63 (1.40 to 1.90)        | <0.001           | 1.34 (1.12 to 1.60)        | 0.001            |
| <i>NO<sub>2</sub> (IQR)</i>   | <i>1.34 (1.26 to 1.42)</i> | <i>&lt;0.001</i> | <i>1.30 (1.22 to 1.38)</i> | <i>&lt;0.001</i> | <i>1.18 (1.10 to 1.28)</i> | <i>&lt;0.001</i> |
| <b>PM<sub>2.5</sub></b>       |                            |                  |                            |                  |                            |                  |
| 1                             | Reference                  |                  | Reference                  |                  | Reference                  |                  |
| 2                             | 1.28 (1.11 to 1.47)        | 0.001            | 1.25 (1.08 to 1.43)        | 0.002            | 1.17 (1.02 to 1.35)        | 0.025            |
| 3                             | 1.46 (1.24 to 1.73)        | <0.001           | 1.46 (1.24 to 1.71)        | <0.001           | 1.30 (1.10 to 1.54)        | 0.002            |
| 4                             | 1.80 (1.50 to 2.17)        | <0.001           | 1.66 (1.38 to 2.00)        | <0.001           | 1.45 (1.20 to 1.75)        | <0.001           |
| <i>PM<sub>2.5</sub> (IQR)</i> | <i>1.14 (1.10 to 1.19)</i> | <i>&lt;0.001</i> | <i>1.13 (1.08 to 1.17)</i> | <i>&lt;0.001</i> | <i>1.09 (1.05 to 1.14)</i> | <i>&lt;0.001</i> |
| <b>PM<sub>10</sub></b>        |                            |                  |                            |                  |                            |                  |
| 1                             | Reference                  |                  | Reference                  |                  | Reference                  |                  |
| 2                             | 1.02 (0.91 to 1.15)        | 0.676            | 0.96 (0.86 to 1.08)        | 0.506            | 0.95 (0.84 to 1.06)        | 0.366            |
| 3                             | 1.36 (1.16 to 1.59)        | <0.001           | 1.23 (1.06 to 1.43)        | 0.007            | 1.15 (0.98 to 1.34)        | 0.080            |
| 4                             | 1.56 (1.31 to 1.85)        | <0.001           | 1.36 (1.15 to 1.61)        | <0.001           | 1.20 (1.01 to 1.43)        | 0.036            |
| <i>PM<sub>10</sub> (IQR)</i>  | <i>1.24 (1.17 to 1.32)</i> | <i>&lt;0.001</i> | <i>1.21 (1.14 to 1.29)</i> | <i>&lt;0.001</i> | <i>1.14 (1.07 to 1.21)</i> | <i>&lt;0.001</i> |
| <b>9-year follow-up</b>       |                            |                  |                            |                  |                            |                  |
|                               | Model 1                    |                  | Model 2                    |                  | Model 3                    |                  |

|                                                                                                                                                                                                                                                                                                                                                                                                                                                                 | <i>IRR (95% CI)</i>        | <i>P value</i>   | <i>IRR (95% CI)</i>        | <i>P value</i>   | <i>IRR (95% CI)</i>        | <i>P value</i>   |
|-----------------------------------------------------------------------------------------------------------------------------------------------------------------------------------------------------------------------------------------------------------------------------------------------------------------------------------------------------------------------------------------------------------------------------------------------------------------|----------------------------|------------------|----------------------------|------------------|----------------------------|------------------|
| NO <sub>2</sub>                                                                                                                                                                                                                                                                                                                                                                                                                                                 |                            |                  |                            |                  |                            |                  |
| 1                                                                                                                                                                                                                                                                                                                                                                                                                                                               | Reference                  |                  | Reference                  |                  | Reference                  |                  |
| 2                                                                                                                                                                                                                                                                                                                                                                                                                                                               | 1.05 (0.94 to 1.18)        | 0.386            | 1.05 (0.94 to 1.17)        | 0.419            | 0.95 (0.85 to 1.07)        | 0.422            |
| 3                                                                                                                                                                                                                                                                                                                                                                                                                                                               | 1.63 (1.40 to 1.89)        | <0.001           | 1.49 (1.29 to 1.73)        | <0.001           | 1.27 (1.08 to 1.49)        | 0.003            |
| 4                                                                                                                                                                                                                                                                                                                                                                                                                                                               | 1.86 (1.57 to 2020)        | <0.001           | 1.56 (1.32 to 1.84)        | <0.001           | 1.24 (1.03 to 1.51)        | 0.026            |
| <i>NO<sub>2</sub> (IQR)</i>                                                                                                                                                                                                                                                                                                                                                                                                                                     | <i>1.33 (1.26 to 1.42)</i> | <i>&lt;0.001</i> | <i>1.29 (1.22 to 1.37)</i> | <i>&lt;0.001</i> | <i>1.18 (1.10 to 1.27)</i> | <i>&lt;0.001</i> |
| PM <sub>2.5</sub>                                                                                                                                                                                                                                                                                                                                                                                                                                               |                            |                  |                            |                  |                            |                  |
| 1                                                                                                                                                                                                                                                                                                                                                                                                                                                               | Reference                  |                  | Reference                  |                  | Reference                  |                  |
| 2                                                                                                                                                                                                                                                                                                                                                                                                                                                               | 1.15 (0.98 to 1.35)        | 0.086            | 1.17 (1.01 to 1.37)        | 0.042            | 1.11 (0.95 to 1.30)        | 0.176            |
| 3                                                                                                                                                                                                                                                                                                                                                                                                                                                               | 1.41 (1.17 to 1.70)        | <0.001           | 1.45 (1.21 to 1.73)        | <0.001           | 1.30 (1.08 to 1.56)        | 0.005            |
| 4                                                                                                                                                                                                                                                                                                                                                                                                                                                               | 1.78 (1.45 to 2.19)        | <0.001           | 1.67 (1.37 to 2.04)        | <0.001           | 1.46 (1.19 to 1.80)        | <0.001           |
| <i>PM<sub>2.5</sub> (IQR)</i>                                                                                                                                                                                                                                                                                                                                                                                                                                   | <i>1.14 (1.10 to 1.19)</i> | <i>&lt;0.001</i> | <i>1.13 (1.08 to 1.17)</i> | <i>&lt;0.001</i> | <i>1.09 (1.05 to 1.14)</i> | <i>&lt;0.001</i> |
| PM <sub>10</sub>                                                                                                                                                                                                                                                                                                                                                                                                                                                |                            |                  |                            |                  |                            |                  |
| 1                                                                                                                                                                                                                                                                                                                                                                                                                                                               | Reference                  |                  | Reference                  |                  | Reference                  |                  |
| 2                                                                                                                                                                                                                                                                                                                                                                                                                                                               | 1.02 (0.89 to 1.16)        | 0.801            | 0.93 (0.82 to 1.05)        | 0.237            | 0.91 (0.80 to 1.03)        | 0.139            |
| 3                                                                                                                                                                                                                                                                                                                                                                                                                                                               | 1.44 (1.21 to 1.71)        | <0.001           | 1.22 (1.04 to 1.45)        | 0.016            | 1.14 (0.96 to 1.35)        | 0.128            |
| 4                                                                                                                                                                                                                                                                                                                                                                                                                                                               | 1.68 (1.39 to 2.04)        | <0.001           | 1.34 (1.12 to 1.61)        | 0.001            | 1.18 (0.98 to 1.42)        | 0.081            |
| <i>PM<sub>10</sub> (IQR)</i>                                                                                                                                                                                                                                                                                                                                                                                                                                    | <i>1.24 (1.17 to 1.32)</i> | <i>&lt;0.001</i> | <i>1.21 (1.14 to 1.28)</i> | <i>&lt;0.001</i> | <i>1.14 (1.07 to 1.21)</i> | <i>&lt;0.001</i> |
| CI=confidence interval; CMHT=community mental health team; IQR=interquartile range; IRR=incident risk ratio; NO <sub>2</sub> , nitrogen dioxide; PM <sub>2.5</sub> =particulate matter <2.5µm; PM <sub>10</sub> =particulate matter <10µm<br>Model 1: Season and year<br>Model 2: Model 1 + age, gender, ethnicity, marital status, comorbid mental health conditions<br>Model 3: Model 2 + neighbourhood deprivation, population density, social fragmentation |                            |                  |                            |                  |                            |                  |

**Table S2a.** Fully adjusted (model 3) associations between PM<sub>2.5</sub> and CMHT events with E-values at Year 1, 5, and 9

|                         | Year 1              |         |         |                 | Year 5              |         |         |                 | Year 9              |         |         |                 |
|-------------------------|---------------------|---------|---------|-----------------|---------------------|---------|---------|-----------------|---------------------|---------|---------|-----------------|
|                         | IRR (95% CI)        | p value | E-value | Lower CI limit* | IRR (95% CI)        | p value | E-value | Lower CI limit* | IRR (95% CI)        | p value | E-value | Lower CI limit* |
| PM <sub>2.5</sub>       |                     |         |         |                 |                     |         |         |                 |                     |         |         |                 |
| <i>Q1</i>               | Reference           |         |         |                 | Reference           |         |         |                 | Reference           |         |         |                 |
| <i>Q2</i>               | 1.07 (0.97 to 1.19) | 0.177   | 1.34    | 1.00            | 1.17 (1.02 to 1.35) | 0.025   | 1.62    | 1.16            | 1.11 (0.95 to 1.30) | 0.176   | 1.46    | 1.00            |
| <i>Q3</i>               | 1.14 (1.01 to 1.29) | 0.032   | 1.54    | 1.11            | 1.30 (1.10 to 1.54) | 0.002   | 1.92    | 1.43            | 1.30 (1.08 to 1.56) | 0.005   | 1.92    | 1.37            |
| <i>Q4</i>               | 1.33 (1.16 to 1.53) | <0.001  | 1.99    | 1.59            | 1.45 (1.20 to 1.75) | <0.001  | 2.26    | 1.69            | 1.46 (1.19 to 1.80) | <0.001  | 2.28    | 1.66            |
| PM <sub>2.5</sub> (IQR) | 1.11 (1.06 to 1.16) | <0.001  | 1.46    | 1.31            | 1.09 (1.05 to 1.14) | <0.001  | 1.40    | 1.28            | 1.09 (1.05 to 1.14) | <0.001  | 1.40    | 1.28            |
| Start year              |                     |         |         |                 |                     |         |         |                 |                     |         |         |                 |
| 2008                    | Reference           |         |         |                 | Reference           |         |         |                 | Reference           |         |         |                 |
| 2009                    | 0.91 (0.84 to 0.99) | 0.021   |         |                 | 0.95 (0.88 to 1.03) | 0.237   |         |                 | 0.98 (0.91 to 1.05) | 0.577   |         |                 |
| 2010                    | 0.98 (0.90 to 1.06) | 0.579   |         |                 | 1.00 (0.93 to 1.08) | 0.901   |         |                 | 1.02 (0.95 to 1.10) | 0.508   |         |                 |
| 2011                    | 0.84 (0.78 to 0.92) | <0.001  |         |                 | 0.86 (0.79 to 0.93) | <0.001  |         |                 | 0.89 (0.82 to 0.96) | 0.003   |         |                 |
| 2012                    | 0.76 (0.70 to 0.83) | <0.001  |         |                 | 0.82 (0.76 to 0.88) | <0.001  |         |                 | 0.87 (0.81 to 0.94) | <0.001  |         |                 |
| Season                  |                     |         |         |                 |                     |         |         |                 |                     |         |         |                 |
| <i>Winter</i>           | Reference           |         |         |                 | Reference           |         |         |                 | Reference           |         |         |                 |
| <i>Spring</i>           | 1.15 (1.05 to 1.26) | 0.003   |         |                 | 1.17 (1.07 to 1.27) | <0.001  |         |                 | 1.16 (1.07 to 1.27) | <0.001  |         |                 |
| <i>Summer</i>           | 1.39 (1.22 to 1.58) | <0.001  |         |                 | 1.34 (1.19 to 1.52) | <0.001  |         |                 | 1.33 (1.18 to 1.50) | <0.001  |         |                 |
| <i>Autumn</i>           | 1.13 (1.03 to 1.25) | 0.012   |         |                 | 1.11 (1.01 to 1.22) | 0.025   |         |                 | 1.09 (1.00 to 1.20) | 0.060   |         |                 |
| Age                     | 1.01 (1.00 to 1.01) | 0.001   |         |                 | 0.98 (0.98 to 0.99) | <0.001  |         |                 | 0.96 (0.96 to 0.97) | <0.001  |         |                 |
| Sex                     | 0.89 (0.84 to 0.94) | <0.001  |         |                 | 0.93 (0.86 to 1.00) | 0.043   |         |                 | 0.86 (0.79 to 0.93) | <0.001  |         |                 |
| Ethnicity               |                     |         |         |                 |                     |         |         |                 |                     |         |         |                 |
| <i>White</i>            | Reference           |         |         |                 | Reference           |         |         |                 | Reference           |         |         |                 |
| <i>Mixed</i>            | 0.90 (0.64 to 1.27) | 0.555   |         |                 | 0.60 (0.52 to 0.69) | <0.001  |         |                 | 0.60 (0.52 to 0.69) | <0.001  |         |                 |
| <i>Asian</i>            | 0.70 (0.63 to 0.78) | <0.001  |         |                 | 0.90 (0.81 to 0.99) | 0.038   |         |                 | 0.90 (0.81 to 0.99) | 0.038   |         |                 |
| <i>Black</i>            | 0.93 (0.87 to 1.00) | 0.063   |         |                 | 0.57 (0.43 to 0.75) | <0.001  |         |                 | 0.57 (0.43 to 0.75) | <0.001  |         |                 |

|                                                                                                                                                                                                                       |                     |         |  |  |                     |        |  |  |                     |        |  |  |
|-----------------------------------------------------------------------------------------------------------------------------------------------------------------------------------------------------------------------|---------------------|---------|--|--|---------------------|--------|--|--|---------------------|--------|--|--|
| <i>Other</i>                                                                                                                                                                                                          | 0.73 (0.59 to 0.91) | 0.005   |  |  | 0.82 (0.36 to 1.85) | 0.637  |  |  | 0.82 (0.36 to 1.85) | 0.637  |  |  |
| Marital status                                                                                                                                                                                                        |                     |         |  |  |                     |        |  |  |                     |        |  |  |
| <i>Married/cohabiting</i>                                                                                                                                                                                             | Reference           |         |  |  | Reference           |        |  |  | Reference           |        |  |  |
| <i>Divorced/separated</i>                                                                                                                                                                                             | 1.13 (1.02 to 1.27) | 0.022   |  |  | 1.36 (1.17 to 1.59) | <0.001 |  |  | 0.87 (0.56 to 1.38) | 0.568  |  |  |
| <i>Widowed</i>                                                                                                                                                                                                        | 1.16 (0.98 to 1.38) | 0.081   |  |  | 1.13 (0.90 to 1.42) | 0.298  |  |  | 1.36 (1.17 to 1.59) | <0.001 |  |  |
| <i>Single</i>                                                                                                                                                                                                         | 1.11 (1.04 to 1.18) | 0.001   |  |  | 1.09 (1.00 to 1.18) | 0.052  |  |  | 1.13 (0.90 to 1.42) | 0.298  |  |  |
| <i>Not disclosed</i>                                                                                                                                                                                                  | 1.21 (1.12 to 1.31) | <0.0011 |  |  | 1.34 (1.20 to 1.50) | <0.001 |  |  | 1.09 (1.00 to 1.18) | 0.052  |  |  |
| Mental health comorbidities                                                                                                                                                                                           | 1.38 (1.29 to 1.48) | <0.00   |  |  | 1.91 (1.72 to 2.11) | <0.001 |  |  | 1.91 (1.72 to 2.11) | <0.001 |  |  |
| Neighbourhood deprivation                                                                                                                                                                                             |                     |         |  |  |                     |        |  |  |                     |        |  |  |
| <i>1</i>                                                                                                                                                                                                              | Reference           |         |  |  | Reference           |        |  |  | Reference           |        |  |  |
| <i>2</i>                                                                                                                                                                                                              | 1.00 (0.92 to 1.09) | 0.958   |  |  | 1.20 (1.07 to 1.36) | 0.002  |  |  | 1.20 (1.07 to 1.36) | 0.002  |  |  |
| <i>3</i>                                                                                                                                                                                                              | 1.13 (1.02 to 1.25) | 0.013   |  |  | 1.23 (1.08 to 1.40) | 0.002  |  |  | 1.23 (1.08 to 1.40) | 0.002  |  |  |
| <i>4</i>                                                                                                                                                                                                              | 1.17 (1.06 to 1.29) | 0.001   |  |  | 1.26 (1.11 to 1.43) | <0.001 |  |  | 1.26 (1.11 to 1.43) | <0.001 |  |  |
| <i>5</i>                                                                                                                                                                                                              | 1.18 (1.07 to 1.30) | 0.001   |  |  | 1.41 (1.24 to 1.60) | <0.001 |  |  | 1.41 (1.24 to 1.60) | <0.001 |  |  |
| Population density                                                                                                                                                                                                    | 1.00 (1.00 to 1.00) | 0.748   |  |  | 1.00 (1.00 to 1.00) | 0.002  |  |  | 1.00 (1.00 to 1.00) | 0.002  |  |  |
| Social fragmentation                                                                                                                                                                                                  | 1.02 (1.01 to 1.04) | 0.005   |  |  | 0.98 (0.97 to 1.01) | 0.165  |  |  | 0.98 (0.97 to 1.01) | 0.165  |  |  |
| *E-values do not include p-values but the lower CI is above 1 (i.e., robust)<br>CI=confidence interval; CMHT=community mental health teams; IQR=interquartile range; IRR: Incidence rate ratio; PM=particulate matter |                     |         |  |  |                     |        |  |  |                     |        |  |  |



**Table S2b.** Fully adjusted (model 3) associations between PM<sub>10</sub> and CMHT events with E-values at Year 1, 5, and 9

|                        | Year 1              |         |         |                 | Year 5              |         |         |                 | Year 9              |         |         |                 |
|------------------------|---------------------|---------|---------|-----------------|---------------------|---------|---------|-----------------|---------------------|---------|---------|-----------------|
|                        | IRR (95% CI)        | p value | E-value | Lower CI limit* | IRR (95% CI)        | p value | E-value | Lower CI limit* | IRR (95% CI)        | p value | E-value | Lower CI limit* |
| PM <sub>10</sub>       |                     |         |         |                 |                     |         |         |                 |                     |         |         |                 |
| Q1                     | Reference           |         |         |                 | Reference           |         |         |                 | Reference           |         |         |                 |
| Q2                     | 1.01 (0.93 to 1.10) | 0.773   | 1.11    | 1.00            | 0.95 (0.84 to 1.06) | 0.366   | 1.29    | 1.00            | 0.91 (0.80 to 1.03) | 0.139   | 1.43    | 1.00            |
| Q3                     | 1.09 (0.98 to 1.22) | 0.115   | 1.40    | 1.00            | 1.15 (0.98 to 1.34) | 0.080   | 1.56    | 1.00            | 1.14 (0.96 to 1.35) | 0.128   | 1.54    | 1.00            |
| Q4                     | 1.26 (1.10 to 1.43) | <0.001  | 1.83    | 1.43            | 1.20 (1.01 to 1.43) | 0.036   | 1.69    | 1.11            | 1.18 (0.98 to 1.42) | 0.081   | 1.64    | 1.00            |
| PM <sub>10</sub> (IQR) | 1.15 (1.07 to 1.22) | <0.001  | 1.56    | 1.34            | 1.14 (1.07 to 1.21) | <0.001  | 1.54    | 1.34            | 1.14 (1.07 to 1.21) | <0.001  | 1.54    | 1.34            |
| Start year             |                     |         |         |                 |                     |         |         |                 |                     |         |         |                 |
| 2008                   | Reference           |         |         |                 | Reference           |         |         |                 | Reference           |         |         |                 |
| 2009                   | 0.91 (0.84 to 0.99) | 0.028   |         |                 | 0.96 (0.88 to 1.03) | 0.258   |         |                 | 0.98 (0.91 to 1.06) | 0.615   |         |                 |
| 2010                   | 1.03 (0.95 to 1.13) | 0.438   |         |                 | 1.06 (0.98 to 1.15) | 0.157   |         |                 | 1.08 (1.00 to 1.17) | 0.049   |         |                 |
| 2011                   | 0.97 (0.89 to 1.05) | 0.478   |         |                 | 0.97 (0.90 to 1.05) | 0.535   |         |                 | 1.00 (0.93 to 1.08) | 0.912   |         |                 |
| 2012                   | 0.83 (0.77 to 0.90) | <0.001  |         |                 | 0.88 (0.82 to 0.96) | 0.002   |         |                 | 0.94 (0.87 to 1.02) | 0.155   |         |                 |
| Season                 |                     |         |         |                 |                     |         |         |                 |                     |         |         |                 |
| Winter                 | Reference           |         |         |                 | Reference           |         |         |                 | Reference           |         |         |                 |
| Spring                 | 1.11 (1.02 to 1.22) | 0.017   |         |                 | 1.16 (1.06 to 1.26) | 0.001   |         |                 | 1.15 (1.05 to 1.25) | 0.001   |         |                 |
| Summer                 | 1.31 (1.16 to 1.49) | <0.001  |         |                 | 1.31 (1.16 to 1.47) | <0.001  |         |                 | 1.29 (1.15 to 1.45) | <0.001  |         |                 |
| Autumn                 | 1.11 (1.00 to 1.22) | 0.045   |         |                 | 1.10 (1.00 to 1.21) | 0.039   |         |                 | 1.08 (0.99 to 1.19) | 0.091   |         |                 |
| Age                    | 1.01 (1.00 to 1.01) | 0.003   |         |                 | 0.98 (0.98 to 0.99) | <0.001  |         |                 | 0.96 (0.96 to 0.97) | <0.001  |         |                 |
| Sex                    | 0.89 (0.84 to 0.94) | <0.001  |         |                 | 0.93 (0.86 to 1.00) | 0.056   |         |                 | 0.86 (0.80 to 0.94) | <0.001  |         |                 |
| Ethnicity              |                     |         |         |                 |                     |         |         |                 |                     |         |         |                 |
| White                  | Reference           |         |         |                 | Reference           |         |         |                 | Reference           |         |         |                 |
| Mixed                  | 0.91 (0.65 to 1.29) | 0.615   |         |                 | 0.60 (0.51 to 0.69) | <0.001  |         |                 | 0.56 (0.47 to 0.65) | <0.001  |         |                 |
| Asian                  | 0.70 (0.62 to 0.78) | <0.001  |         |                 | 0.90 (0.81 to 1.00) | 0.045   |         |                 | 0.85 (0.76 to 0.94) | 0.003   |         |                 |
| Black                  | 0.93 (0.87 to 1.00) | 0.068   |         |                 | 0.57 (0.43 to 0.75) | <0.001  |         |                 | 0.99 (0.70 to 1.39) | 0.948   |         |                 |

|                             |                     |        |  |  |                     |        |  |  |                     |        |  |  |
|-----------------------------|---------------------|--------|--|--|---------------------|--------|--|--|---------------------|--------|--|--|
| <i>Other</i>                | 0.73 (0.59 to 0.90) | 0.004  |  |  | 0.81 (0.36 to 1.82) | 0.612  |  |  | 0.84 (0.35 to 1.98) | 0.689  |  |  |
| Marital status              |                     |        |  |  |                     |        |  |  |                     |        |  |  |
| <i>Married/cohabiting</i>   | Reference           |        |  |  | Reference           |        |  |  | Reference           |        |  |  |
| <i>Divorced/separated</i>   | 1.14 (1.02 to 1.27) | 0.021  |  |  | 1.38 (1.18 to 1.61) | <0.001 |  |  | 1.02 (0.63 to 1.65) | 0.945  |  |  |
| <i>Widowed</i>              | 1.17 (0.98 to 1.38) | 0.076  |  |  | 1.13 (0.90 to 1.42) | 0.302  |  |  | 1.45 (1.23 to 1.71) | <0.001 |  |  |
| <i>Single</i>               | 1.11 (1.04 to 1.18) | 0.002  |  |  | 1.08 (0.99 to 1.18) | 0.067  |  |  | 1.11 (0.86 to 1.43) | 0.412  |  |  |
| <i>Not disclosed</i>        | 1.21 (.111 to 1.31) | <0.001 |  |  | 1.33 (1.19 to 1.49) | <0.001 |  |  | 1.24 (1.13 to 1.36) | <0.001 |  |  |
| Mental health comorbidities | 1.38 (1.29 to 1.48) | <0.001 |  |  | 1.89 (1.71 to 2.09) | <0.001 |  |  | 1.50 (1.33 to 1.69) | <0.001 |  |  |
| Neighbourhood deprivation   |                     |        |  |  |                     |        |  |  |                     |        |  |  |
| 1                           | Reference           |        |  |  | Reference           |        |  |  | Reference           |        |  |  |
| 2                           | 1.00 (0.92 to 1.09) | 0.961  |  |  | 1.19 (1.06 to 1.34) | 0.004  |  |  | 1.19 (1.04 to 1.35) | 0.010  |  |  |
| 3                           | 1.13 (1.03 to 1.25) | 0.013  |  |  | 1.23 (1.08 to 1.40) | 0.002  |  |  | 1.09 (0.95 to 1.25) | 0.232  |  |  |
| 4                           | 1.17 (1.06 to 1.28) | 0.002  |  |  | 1.25 (1.10 to 1.42) | 0.001  |  |  | 1.09 (0.95 to 1.26) | 0.204  |  |  |
| 5                           | 1.18 (1.07 to 1.29) | 0.0011 |  |  | 1.41 (1.24 to 1.60) | <0.001 |  |  | 1.34 (1.16 to 1.54) | <0.001 |  |  |
| Population density          | 1.00 (1.00 to 1.00) | 0.759  |  |  | 1.00 (1.00 to 1.00) | 0.001  |  |  | 1.00 (0.98 to 1.03) | 0.005  |  |  |
| Social fragmentation        | 1.02 (1.01 to 1.04) | 0.006  |  |  | 0.99 (0.97 to 1.01) | 0.211  |  |  | 1.00 (0.98 to 1.03) | 0.731  |  |  |

\*E-values do not include p-values but the lower CI is above 1 (i.e., robust)

CI=confidence interval; CMHT=Community mental health teams; IQR=interquartile range; IRR: Incidence rate ratio; PM=particulate matter

**Table S2c.** Fully adjusted (model 3) associations between NO<sub>2</sub> and CMHT events with E-values at Year 1, 5, and 9

|                       | Year 1              |         |         |                 | Year 5              |         |         |                 | Year 9              |         |         |                 |
|-----------------------|---------------------|---------|---------|-----------------|---------------------|---------|---------|-----------------|---------------------|---------|---------|-----------------|
|                       | IRR (95% CI)        | p value | E-value | Lower CI limit* | IRR (95% CI)        | p value | E-value | Lower CI limit* | IRR (95% CI)        | p value | E-value | Lower CI limit* |
| NO <sub>2</sub>       |                     |         |         |                 |                     |         |         |                 |                     |         |         |                 |
| <i>Q1</i>             | Reference           |         |         |                 | Reference           |         |         |                 | Reference           |         |         |                 |
| <i>Q2</i>             | 1.09 (1.01 to 1.18) | 0.030   | 1.40    | 1.11            | 1.01 (0.91 to 1.13) | 0.781   | 1.11    | 1.00            | 0.95 (0.85 to 1.07) | 0.422   | 1.29    | 1.00            |
| <i>Q3</i>             | 1.15 (1.03 to 1.29) | 0.010   | 1.57    | 1.21            | 1.35 (1.16 to 1.57) | <0.001  | 2.04    | 1.59            | 1.27 (1.08 to 1.49) | 0.003   | 1.86    | 1.37            |
| <i>Q4</i>             | 1.27 (1.11 to 1.45) | 0.001   | 1.86    | 1.46            | 1.34 (1.12 to 1.60) | 0.001   | 2.01    | 1.49            | 1.24 (1.03 to 1.51) | 0.026   | 1.79    | 1.21            |
| NO <sub>2</sub> (IQR) | 1.18 (1.09 to 1.28) | <0.001  | 1.64    | 1.40            | 1.18 (1.10 to 1.28) | <0.001  | 1.64    | 1.43            | 1.18 (1.10 to 1.27) | <0.001  | 1.64    | 1.43            |
| Start year            |                     |         |         |                 |                     |         |         |                 |                     |         |         |                 |
| 2008                  | Reference           |         |         |                 | Reference           |         |         |                 | Reference           |         |         |                 |
| 2009                  | 0.91 (0.84 to 0.98) | 0.018   |         |                 | 0.95 (0.88 to 1.02) | 0.182   |         |                 | 0.97 (0.90 to 1.05) | 0.473   |         |                 |
| 2010                  | 0.98 (0.91 to 1.06) | 0.680   |         |                 | 1.01 (0.94 to 1.09) | 0.741   |         |                 | 1.03 (0.96 to 1.11) | 0.385   |         |                 |
| 2011                  | 0.97 (0.89 to 1.05) | 0.401   |         |                 | 0.97 (0.90 to 1.05) | 0.505   |         |                 | 1.00 (0.93 to 1.08) | 0.955   |         |                 |
| 2012                  | 0.81 (0.75 to 0.87) | <0.001  |         |                 | 0.86 (0.80 to 0.93) | <0.001  |         |                 | 0.92 (0.85 to 0.99) | 0.032   |         |                 |
| Season                |                     |         |         |                 |                     |         |         |                 |                     |         |         |                 |
| <i>Winter</i>         | Reference           |         |         |                 | Reference           |         |         |                 | Reference           |         |         |                 |
| <i>Spring</i>         | 1.16 (1.05 to 1.29) | 0.004   |         |                 | 1.21 (1.10 to 1.33) | <0.001  |         |                 | 1.20 (1.09 to 1.32) | <0.001  |         |                 |
| <i>Summer</i>         | 1.27 (1.14 to 1.41) | <0.001  |         |                 | 1.27 (1.15 to 1.41) | <0.001  |         |                 | 1.25 (1.13 to 1.39) | <0.001  |         |                 |
| <i>Autumn</i>         | 0.97 (0.90 to 1.04) | 0.369   |         |                 | 0.97 (0.91 to 1.04) | 0.412   |         |                 | 0.95 (0.89 to 1.01) | 0.134   |         |                 |
| Age                   | 1.01 (1.00 to 1.01) | 0.004   |         |                 | 0.98 (0.97 to 0.98) | <0.001  |         |                 | 0.96 (0.96 to 0.97) | <0.001  |         |                 |
| Sex                   | 0.89 (0.85 to 0.94) | <0.001  |         |                 | 0.93 (0.86 to 1.00) | 0.063   |         |                 | 0.87 (0.80 to 0.94) | 0.001   |         |                 |
| Ethnicity             |                     |         |         |                 |                     |         |         |                 |                     |         |         |                 |
| <i>White</i>          | Reference           |         |         |                 | Reference           |         |         |                 | Reference           |         |         |                 |
| <i>Mixed</i>          | 0.93 (0.65 to 1.31) | 0.666   |         |                 | 0.60 (0.52 to 0.69) | <0.001  |         |                 | 0.56 (0.48 to 0.66) | <0.001  |         |                 |
| <i>Asian</i>          | 0.70 (0.62 to 0.78) | <0.001  |         |                 | 0.89 (0.81 to 0.99) | 0.034   |         |                 | 0.84 (0.75 to 0.94) | 0.003   |         |                 |
| <i>Black</i>          | 0.93 (0.86 to 1.00) | 0.050   |         |                 | 0.56 (0.42 to 0.74) | <0.001  |         |                 | 0.96 (0.68 to 1.36) | 0.825   |         |                 |

|                             |                     |        |  |  |                     |        |  |  |                     |        |  |  |
|-----------------------------|---------------------|--------|--|--|---------------------|--------|--|--|---------------------|--------|--|--|
| <i>Other</i>                | 0.72 (0.58 to 0.90) | 0.003  |  |  | 0.83 (0.37 to 1.86) | 0.647  |  |  | 0.87 (0.37 to 2.04) | 0.743  |  |  |
| Marital status              |                     |        |  |  |                     |        |  |  |                     |        |  |  |
| <i>Married/cohabiting</i>   | Reference           |        |  |  | Reference           |        |  |  | Reference           |        |  |  |
| <i>Divorced/separated</i>   | 0.79 (0.55 to 1.14) | 0.213  |  |  | 0.89 (0.56 to 1.40) | 0.616  |  |  | 1.09 (0.67 to 1.7)  | 0.723  |  |  |
| <i>Widowed</i>              | 1.14 (1.02 to 1.27) | 0.017  |  |  | 1.37 (1.18 to 1.60) | <0.001 |  |  | 1.43 (1.21 to 1.69) | <0.001 |  |  |
| <i>Single</i>               | 1.17 (0.98 to 1.38) | 0.074  |  |  | 1.11 (0.89 to 1.40) | 0.350  |  |  | 1.09 (0.85 to 1.40) | 0.481  |  |  |
| <i>Not disclosed</i>        | 1.11 (1.04 to 1.18) | 0.001  |  |  | 1.08 (0.99 to 1.18) | 0.062  |  |  | 1.24 (1.13 to 1.36) | <0.001 |  |  |
| Mental health comorbidities | 1.37 (1.28 to 1.47) | <0.001 |  |  | 1.87 (1.69 to 2.07) | <0.001 |  |  | 1.51 (1.34 to 1.71) | <0.001 |  |  |
| Neighbourhood deprivation   |                     |        |  |  |                     |        |  |  |                     |        |  |  |
| 1                           | Reference           |        |  |  | Reference           |        |  |  | Reference           |        |  |  |
| 2                           | 1.00 (0.92 to 1.10) | 0.926  |  |  | 1.22 (1.08 to 1.37) | 0.001  |  |  | 1.20 (1.06 to 1.37) | 0.005  |  |  |
| 3                           | 1.12 (1.02 to 1.24) | 0.017  |  |  | 1.25 (1.09 to 1.42) | 0.001  |  |  | 1.11 (0.96 to 1.28) | 0.154  |  |  |
| 4                           | 1.16 (1.06 to 1.28) | 0.002  |  |  | 1.28 (1.12 to 1.45) | <0.001 |  |  | 1.12 (0.97 to 1.28) | 0.121  |  |  |
| 5                           | 1.17 (1.06 to 1.29) | 0.001  |  |  | 1.42 (1.24 to 1.61) | <0.001 |  |  | 1.36 (1.18 to 1.56) | <0.001 |  |  |
| Population density          | 1.00 (1.00 to 1.01) | 0.976  |  |  | 1.00 (1.00 to 1.00) | 0.008  |  |  | 1.00 (1.00 to 1.00) | 0.019  |  |  |
| Social fragmentation        | 1.02 (1.00 to 1.03) | 0.031  |  |  | 0.98 (0.96 to 1.00) | 0.081  |  |  | 1.00 (0.98 to 1.02) | 0.950  |  |  |

\*E-values do not include p-values but the lower CI is above 1 (i.e., robust)

CI=confidence interval; CMHT=Community mental health teams; IQR=interquartile range; IRR: Incidence rate ratio; NO<sub>2</sub>=nitrogen dioxide

| <b>Table S3.</b> Population attributable fractions (PAF) and relative risk calculations associated with current versus counterfactual air pollution exposure |                               |                     |                                                                        |                             |                          |                               |                                                         |                             |                          |                               |
|--------------------------------------------------------------------------------------------------------------------------------------------------------------|-------------------------------|---------------------|------------------------------------------------------------------------|-----------------------------|--------------------------|-------------------------------|---------------------------------------------------------|-----------------------------|--------------------------|-------------------------------|
| <b>Association of air pollutant with CMHT events</b>                                                                                                         |                               |                     | <b>Scenario: London</b>                                                |                             |                          |                               | <b>Scenario: all UK urban traffic areas</b>             |                             |                          |                               |
|                                                                                                                                                              |                               |                     | Mean population weighted exposure ( $\mu\text{g}/\text{m}^3$ ) in 2019 |                             |                          |                               | Mean urban traffic ( $\mu\text{g}/\text{m}^3$ ) in 2021 |                             |                          |                               |
|                                                                                                                                                              | Study levels (2008-2012)      | RR (95% CI)         | Current <sup>a</sup>                                                   | Counterfactual <sup>b</sup> | RR (95% CI) <sup>c</sup> | PAF (%) <sup>d</sup> (95% CI) | Current <sup>a</sup>                                    | Counterfactual <sup>b</sup> | RR (95% CI) <sup>c</sup> | PAF (%) <sup>d</sup> (95% CI) |
| PM <sub>2.5</sub>                                                                                                                                            | 14.4 $\mu\text{g}/\text{m}^3$ | 1.11 (1.06 to 1.16) | 11.6 $\mu\text{g}/\text{m}^3$                                          | 5 $\mu\text{g}/\text{m}^3$  | 1.15 (1.08 to 1.22)      | 13% (7% to 18%)               | 8.3 $\mu\text{g}/\text{m}^3$                            | 5 $\mu\text{g}/\text{m}^3$  | 1.07 (1.04 to 1.10)      | 6% (4% to 9%)                 |
| NO <sub>2</sub>                                                                                                                                              | 38.6 $\mu\text{g}/\text{m}^3$ | 1.18 (1.09 to 1.28) | 39.0 $\mu\text{g}/\text{m}^3$                                          | 10 $\mu\text{g}/\text{m}^3$ | 1.62 (1.28 to 2.05)      | 38% (22% to 51%)              | 24.8 $\mu\text{g}/\text{m}^3$                           | 10 $\mu\text{g}/\text{m}^3$ | 1.28 (1.14 to 1.44)      | 22% (12% to 30%)              |

Note: <sup>a</sup>Most recent average concentrations (average London levels for 2019: [https://www.london.gov.uk/sites/default/files/air\\_pollution\\_monitoring\\_data\\_in\\_london\\_2016\\_to\\_2020\\_feb2020.pdf](https://www.london.gov.uk/sites/default/files/air_pollution_monitoring_data_in_london_2016_to_2020_feb2020.pdf), and average UK levels from urban traffic areas: <https://www.gov.uk/government/statistics/air-quality-statistics/nitrogen-dioxide>); <sup>b</sup>World Health Organization's annual exposure threshold; <sup>c</sup>Current vs counterfactual; <sup>d</sup>(RR-1)/RR (95% CI)  
 CI=confidence interval; CMHT=community mental health teams; PAF=population attributable fraction; RR=relative risk; NO<sub>2</sub>, nitrogen dioxide; PM<sub>2.5</sub>=particulate matter with a diameter of <2.5 $\mu\text{m}$

**Table S4.** Fully adjusted associations between air pollutants and HoNOS65+ items at Year 1 (N=4076)

|                                        | <i>NO<sub>2</sub></i>      |                  | <i>PM<sub>2.5</sub></i>    |                | <i>PM<sub>10</sub></i>     |                  |
|----------------------------------------|----------------------------|------------------|----------------------------|----------------|----------------------------|------------------|
|                                        | <i>β (95% CI)</i>          | <i>p value</i>   | <i>β (95% CI)</i>          | <i>p value</i> | <i>β (95% CI)</i>          | <i>p value</i>   |
| Activities of daily living             | <b>0.23 (0.14 to 0.32)</b> | <b>&lt;0.001</b> | <b>0.07 (0.02 to 0.12)</b> | <b>0.003</b>   | <b>0.14 (0.07 to 0.22)</b> | <b>&lt;0.001</b> |
| Physical illness/disability            | <b>0.21 (0.12 to 0.30)</b> | <b>&lt;0.001</b> | <b>0.06 (0.01 to 0.11)</b> | <b>0.016</b>   | <b>0.13 (0.05 to 0.20)</b> | <b>0.001</b>     |
| Problems with relationships            | <b>0.19 (0.12 to 0.25)</b> | <b>&lt;0.001</b> | 0.03 (-0.01 to 0.07)       | 0.106          | <b>0.08 (0.02 to 0.13)</b> | <b>0.010</b>     |
| Problems with living conditions        | <b>0.17 (0.10 to 0.23)</b> | <b>&lt;0.001</b> | <b>0.05 (0.02 to 0.09)</b> | <b>0.002</b>   | <b>0.08 (0.03 to 0.14)</b> | <b>0.002</b>     |
| Other mental health problems           | <b>0.15 (0.07 to 0.23)</b> | <b>&lt;0.001</b> | <b>0.04 (0.00 to 0.09)</b> | <b>0.049</b>   | <b>0.07 (0.00 to 0.14)</b> | <b>0.047</b>     |
| Cognitive problems                     | <b>0.13 (0.06 to 0.20)</b> | <b>&lt;0.001</b> | <b>0.04 (0.00 to 0.08)</b> | <b>0.039</b>   | <b>0.08 (0.02 to 0.14)</b> | <b>0.006</b>     |
| Behavioural disturbance                | <b>0.12 (0.04 to 0.19)</b> | <b>0.002</b>     | 0.01 (-0.03 to 0.05)       | 0.584          | 0.05 (-0.02 to 0.11)       | 0.176            |
| Problems with occupational activities  | <b>0.11 (0.03 to 0.19)</b> | <b>0.007</b>     | -0.01 (-0.05 to 0.04)      | 0.803          | 0.02 (-0.04 to 0.09)       | 0.505            |
| Depressive symptoms                    | <b>0.08 (0.02 to 0.13)</b> | <b>0.008</b>     | 0.01 (-0.02 to 0.04)       | 0.507          | 0.02 (-0.02 to 0.07)       | 0.296            |
| Non-accidental self-injury             | <b>0.05 (0.02 to 0.08)</b> | <b>0.002</b>     | <b>0.02 (0.00 to 0.03)</b> | <b>0.040</b>   | 0.02 (-0.01 to 0.05)       | 0.084            |
| Problem drinking or drug-use           | 0.02 (-0.02 to 0.06)       | 0.253            | 0.01 (-0.01 to 0.03)       | 0.386          | 0.01 (-0.02 to 0.04)       | 0.694            |
| Problems with hallucinations/delusions | -0.01 (-0.08 to 0.06)      | 0.724            | 0.00 (-0.03 to 0.04)       | 0.936          | 0.01 (-0.05 to 0.06)       | 0.830            |

CI=confidence interval; HoNOS=Health of the Nation Outcome Scale; NO<sub>2</sub>=nitrogen dioxide; PM<sub>2.5</sub>=particulate matter <2.5µm; PM<sub>10</sub>=particulate matter <10µm  
Covariates: Season, year, age, gender, ethnicity, marital status, comorbid mental health conditions, IMD (Index of Multiple Deprivation), population density, social fragmentation

| <b>Table S5. Difference between analytical and excluded samples</b>                                                                                                                                                                                                                                                                                                                                                                                                                                                                                                      |                               |                             |                |
|--------------------------------------------------------------------------------------------------------------------------------------------------------------------------------------------------------------------------------------------------------------------------------------------------------------------------------------------------------------------------------------------------------------------------------------------------------------------------------------------------------------------------------------------------------------------------|-------------------------------|-----------------------------|----------------|
|                                                                                                                                                                                                                                                                                                                                                                                                                                                                                                                                                                          | Analytical sample<br>(N=5024) | Excluded sample<br>(N=1418) |                |
|                                                                                                                                                                                                                                                                                                                                                                                                                                                                                                                                                                          | <i>M±SD, N(%)</i>             | <i>M±SD, N(%)</i>           | <i>p value</i> |
| Dementia diagnosis                                                                                                                                                                                                                                                                                                                                                                                                                                                                                                                                                       |                               |                             | <0.001         |
| <i>Alzheimer's disease</i>                                                                                                                                                                                                                                                                                                                                                                                                                                                                                                                                               | 2676 (53.3)                   | 574 (40.5)                  |                |
| <i>Vascular dementia</i>                                                                                                                                                                                                                                                                                                                                                                                                                                                                                                                                                 | 1018 (20.3)                   | 365 (25.7)                  |                |
| <i>Other/unspecified dementia</i>                                                                                                                                                                                                                                                                                                                                                                                                                                                                                                                                        | 1330 (26.5)                   | 479 (33.8)                  |                |
| Age                                                                                                                                                                                                                                                                                                                                                                                                                                                                                                                                                                      | 81.4±7.2                      | 74.6±14.0                   | <0.001         |
| Female                                                                                                                                                                                                                                                                                                                                                                                                                                                                                                                                                                   | 3132 (62.3)                   | 799 (56.8)                  | <0.001         |
| Ethnicity                                                                                                                                                                                                                                                                                                                                                                                                                                                                                                                                                                |                               |                             | 0.172          |
| <i>White</i>                                                                                                                                                                                                                                                                                                                                                                                                                                                                                                                                                             | 3934 (78.3)                   | 1020 (77.3)                 |                |
| <i>Mixed</i>                                                                                                                                                                                                                                                                                                                                                                                                                                                                                                                                                             | 31 (0.6)                      | 13 (1.0)                    |                |
| <i>Asian</i>                                                                                                                                                                                                                                                                                                                                                                                                                                                                                                                                                             | 262 (5.2)                     | 57 (4.3)                    |                |
| <i>Black</i>                                                                                                                                                                                                                                                                                                                                                                                                                                                                                                                                                             | 718 (14.3)                    | 200 (15.1)                  |                |
| <i>Other</i>                                                                                                                                                                                                                                                                                                                                                                                                                                                                                                                                                             | 69 (1.4)                      | 25 (1.9)                    |                |
| <i>Not stated</i>                                                                                                                                                                                                                                                                                                                                                                                                                                                                                                                                                        | 10 (0.2)                      | 5 (0.4)                     |                |
| Marital status                                                                                                                                                                                                                                                                                                                                                                                                                                                                                                                                                           |                               |                             | <0.001         |
| <i>Married/cohabiting</i>                                                                                                                                                                                                                                                                                                                                                                                                                                                                                                                                                | 1696 (33.8)                   | 405 (28.8)                  |                |
| <i>Divorced/separated</i>                                                                                                                                                                                                                                                                                                                                                                                                                                                                                                                                                | 396 (7.9)                     | 138 (9.8)                   |                |
| <i>Widowed</i>                                                                                                                                                                                                                                                                                                                                                                                                                                                                                                                                                           | 2034 (40.5)                   | 431 (30.6)                  |                |
| <i>Single</i>                                                                                                                                                                                                                                                                                                                                                                                                                                                                                                                                                            | 740 (14.7)                    | 309 (22.0)                  |                |
| <i>Not disclosed</i>                                                                                                                                                                                                                                                                                                                                                                                                                                                                                                                                                     | 158 (3.1)                     | 123 (8.7)                   |                |
| Mental health comorbidities<br>( <i>Median (IQR)</i> )                                                                                                                                                                                                                                                                                                                                                                                                                                                                                                                   | 0 (0 to 0)<br>Range:0 to 3    | 0 (0 to 0)<br>Range: 0 to 4 | <0.001         |
| Neighbourhood deprivation                                                                                                                                                                                                                                                                                                                                                                                                                                                                                                                                                | 26.0±11.6                     | 26.8±12.0                   | 0.017          |
| Population density                                                                                                                                                                                                                                                                                                                                                                                                                                                                                                                                                       | 92.7±52.7                     | 98.0±49.8                   | 0.004          |
| Social fragmentation                                                                                                                                                                                                                                                                                                                                                                                                                                                                                                                                                     | 2.3±2.5                       | 3.0±2.3                     | <0.001         |
| CMHT events                                                                                                                                                                                                                                                                                                                                                                                                                                                                                                                                                              |                               |                             |                |
| <i>Year 1 (Median (IQR))</i>                                                                                                                                                                                                                                                                                                                                                                                                                                                                                                                                             | 4 (2 to 8.5)                  | 4 (2 to 7)                  | <0.001         |
| <i>Year 5 (Median (IQR))</i>                                                                                                                                                                                                                                                                                                                                                                                                                                                                                                                                             | 8 (3 to 17)                   | 6 (3 to 15)                 | <0.001         |
| <i>Year 9 (Median (IQR))</i>                                                                                                                                                                                                                                                                                                                                                                                                                                                                                                                                             | 9 (4 to 19)                   | 7 (3 to 18)                 | <0.001         |
| Active SLaM days                                                                                                                                                                                                                                                                                                                                                                                                                                                                                                                                                         |                               |                             |                |
| <i>Year 1 (Median (IQR))</i>                                                                                                                                                                                                                                                                                                                                                                                                                                                                                                                                             | 246 (87.5 to 366)             | 169 (28 to 366)             | <0.001         |
| <i>Year 5 (Median (IQR))</i>                                                                                                                                                                                                                                                                                                                                                                                                                                                                                                                                             | 394.5 (140.5 to 899)          | 269 (41 to 800)             | <0.001         |
| <i>Year 9 (Median (IQR))</i>                                                                                                                                                                                                                                                                                                                                                                                                                                                                                                                                             | 428 (151 to 960.5)            | 301.5 (46 to 935)           | <0.001         |
| NO <sub>2</sub> (µg/m <sup>3</sup> )                                                                                                                                                                                                                                                                                                                                                                                                                                                                                                                                     | 38.6±10.2                     | 39.7±10.1                   | 0.012          |
| PM <sub>2.5</sub> (µg/m <sup>3</sup> )                                                                                                                                                                                                                                                                                                                                                                                                                                                                                                                                   | 14.4±3.0                      | 14.4±2.8                    | 0.792          |
| PM <sub>10</sub> (µg/m <sup>3</sup> )                                                                                                                                                                                                                                                                                                                                                                                                                                                                                                                                    | 21.1±4.3                      | 21.4±4.2                    | 0.115          |
| CMHT=community mental health teams; IQR=interquartile range; M=mean; NO <sub>2</sub> =nitrogen dioxide; PM <sub>2.5</sub> =particulate matter with a diameter of <2.5µm; PM <sub>10</sub> =particulate matter with a diameter of <10µm; SD=standard deviation; SLaM=South London and the Maudsley NHS Foundation Trust<br>Neighbourhood deprivation: Index of Multiple Deprivation (IMD) score; population density: persons per hectare; social fragmentation: z-scored composite of unmarried adults, single-person households, housing tenure and population turnover. |                               |                             |                |

**Table S6.** Examining the impact of missing data by assessing associations between air pollution and CMHT events at 1-, 5-, and 9-years in patients with dementia using multiple imputation by chained equations (N=5272)

| <b>1-year follow-up</b>       |                            |                  |                            |                  |                            |                  |
|-------------------------------|----------------------------|------------------|----------------------------|------------------|----------------------------|------------------|
|                               | Model 1                    |                  | Model 2                    |                  | Model 3                    |                  |
|                               | <i>IRR (95% CI)</i>        | <i>P value</i>   | <i>IRR (95% CI)</i>        | <i>P value</i>   | <i>IRR (95% CI)</i>        | <i>P value</i>   |
| NO <sub>2</sub>               |                            |                  |                            |                  |                            |                  |
| 1                             | Reference                  |                  | Reference                  |                  | Reference                  |                  |
| 2                             | 1.20 (1.11 to 1.29)        | <0.001           | 1.19 (1.11 to 1.29)        | <0.001           | 1.10 (1.02 to 1.19)        | 0.014            |
| 3                             | 1.28 (1.16 to 1.41)        | <0.001           | 1.26 (1.14 to 1.39)        | <0.001           | 1.10 (0.99 to 1.23)        | 0.078            |
| 4                             | 1.56 (1.39 to 1.74)        | <0.001           | 1.50 (1.34 to 1.68)        | <0.001           | 1.24 (1.09 to 1.41)        | 0.001            |
| <i>NO<sub>2</sub> (IQR)</i>   | <i>1.32 (1.24 to 1.40)</i> | <i>&lt;0.001</i> | <i>1.28 (1.20 to 1.36)</i> | <i>&lt;0.001</i> | <i>1.16 (1.07 to 1.25)</i> | <i>&lt;0.001</i> |
| PM <sub>2.5</sub>             |                            |                  |                            |                  |                            |                  |
| 1                             | Reference                  |                  | Reference                  |                  | Reference                  |                  |
| 2                             | 1.17 (1.05 to 1.29)        | 0.003            | 1.15 (1.04 to 1.27)        | 0.008            | 1.09 (0.9 to 1.21)         | 0.085            |
| 3                             | 1.29 (1.14 to 1.45)        | <0.001           | 1.29 (1.15 to 1.46)        | <0.001           | 1.17 (1.04 to 1.32)        | 0.011            |
| 4                             | 1.55 (1.35 to 1.78)        | <0.001           | 1.52 (1.33 to 1.74)        | <0.001           | 1.35 (1.17 to 1.55)        | <0.001           |
| <i>PM<sub>2.5</sub> (IQR)</i> | <i>1.16 (1.11 to 1.21)</i> | <i>&lt;0.001</i> | <i>1.14 (1.10 to 1.19)</i> | <i>&lt;0.001</i> | <i>1.11 (1.06 to 1.15)</i> | <i>&lt;0.001</i> |
| PM <sub>10</sub>              |                            |                  |                            |                  |                            |                  |
| 1                             | Reference                  |                  | Reference                  |                  | Reference                  |                  |
| 2                             | 1.04 (0.96 to 1.14)        | 0.320            | 1.03 (0.94 to 1.12)        | 0.518            | 0.99 (0.91 to 1.08)        | 0.917            |
| 3                             | 1.22 (1.09 to 1.36)        | <0.001           | 1.19 (1.06 to 1.32)        | 0.002            | 1.09 (0.98 to 1.22)        | 0.115            |
| 4                             | 1.42 (1.25 to 1.61)        | <0.001           | 1.37 (1.21 to 1.55)        | <0.001           | 1.21 (1.07 to 1.37)        | 0.003            |
| <i>PM<sub>10</sub> (IQR)</i>  | <i>1.24 (1.16 to 1.32)</i> | <i>&lt;0.001</i> | <i>1.21 (1.14 to 1.29)</i> | <i>&lt;0.001</i> | <i>1.14 (1.07 to 1.21)</i> | <i>&lt;0.001</i> |
| <b>5-year follow-up</b>       |                            |                  |                            |                  |                            |                  |
|                               | Model 1                    |                  | Model 2                    |                  | Model 3                    |                  |
|                               | <i>IRR (95% CI)</i>        | <i>P value</i>   | <i>IRR (95% CI)</i>        | <i>P value</i>   | <i>IRR (95% CI)</i>        | <i>P value</i>   |
| NO <sub>2</sub>               |                            |                  |                            |                  |                            |                  |
| 1                             | Reference                  |                  | Reference                  |                  | Reference                  |                  |
| 2                             | 1.13 (1.02 to 1.25)        | 0.014            | 1.12 (1.01 to 1.23)        | 0.028            | 1.01 (0.91 to 1.13)        | 0.770            |
| 3                             | 1.49 (1.29 to 1.71)        | <0.001           | 1.41 (1.23 to 1.61)        | <0.001           | 1.19 (1.03 to 1.38)        | 0.020            |
| 4                             | 1.65 (1.42 to 1.93)        | <0.001           | 1.51 (1.30 to 1.75)        | <0.001           | 1.20 (1.01 to 1.43)        | 0.041            |
| <i>NO<sub>2</sub> (IQR)</i>   | <i>1.44 (1.32 to 1.57)</i> | <i>&lt;0.001</i> | <i>1.33 (1.22 to 1.45)</i> | <i>&lt;0.001</i> | <i>1.19 (1.07 to 1.31)</i> | <i>0.001</i>     |
| PM <sub>2.5</sub>             |                            |                  |                            |                  |                            |                  |
| 1                             | Reference                  |                  | Reference                  |                  | Reference                  |                  |
| 2                             | 1.26 (1.09 to 1.44)        | 0.001            | 1.24 (1.08 to 1.42)        | 0.002            | 1.17 (1.02 to 1.34)        | 0.029            |
| 3                             | 1.46 (1.24 to 1.71)        | <0.001           | 1.46 (1.24 to 1.71)        | <0.001           | 1.29 (1.09 to 1.52)        | 0.003            |
| 4                             | 1.76 (1.46 to 2.12)        | <0.001           | 1.66 (1.39 to 2.00)        | <0.001           | 1.44 (1.19 to 1.73)        | <0.001           |
| <i>PM<sub>2.5</sub> (IQR)</i> | <i>1.15 (1.08 to 1.21)</i> | <i>&lt;0.001</i> | <i>1.12 (1.06 to 1.18)</i> | <i>&lt;0.001</i> | <i>1.08 (1.02 to 1.14)</i> | <i>0.005</i>     |
| PM <sub>10</sub>              |                            |                  |                            |                  |                            |                  |
| 1                             | Reference                  |                  | Reference                  |                  | Reference                  |                  |
| 2                             | 1.00 (0.89 to 1.12)        | 0.969            | 0.95 (0.85 to 1.07)        | 0.420            | 0.94 (0.84 to 1.05)        | 0.275            |
| 3                             | 1.33 (1.14 to 1.55)        | <0.001           | 1.23 (1.06 to 1.43)        | 0.006            | 1.14 (0.98 to 1.33)        | 0.088            |
| 4                             | 1.42 (1.19 to 1.68)        | <0.001           | 1.28 (1.09 to 1.52)        | 0.003            | 1.12 (0.95 to 1.33)        | 0.177            |



| <i>PM<sub>10</sub> (IQR)</i>                                                                                                                                                                                                                                                                                                                                                                                                                                   | <i>1.28 (1.18 to 1.40)</i> | <i>&lt;0.001</i> | <i>1.22 (1.12 to 1.32)</i> | <i>&lt;0.001</i> | <i>1.14 (1.04 to 1.24)</i> | <i>0.004</i>   |
|----------------------------------------------------------------------------------------------------------------------------------------------------------------------------------------------------------------------------------------------------------------------------------------------------------------------------------------------------------------------------------------------------------------------------------------------------------------|----------------------------|------------------|----------------------------|------------------|----------------------------|----------------|
| <b>9-year follow-up</b>                                                                                                                                                                                                                                                                                                                                                                                                                                        |                            |                  |                            |                  |                            |                |
|                                                                                                                                                                                                                                                                                                                                                                                                                                                                | Model 1                    |                  | Model 2                    |                  | Model 3                    |                |
|                                                                                                                                                                                                                                                                                                                                                                                                                                                                | <i>IRR (95% CI)</i>        | <i>P value</i>   | <i>IRR (95% CI)</i>        | <i>P value</i>   | <i>IRR (95% CI)</i>        | <i>P value</i> |
| NO <sub>2</sub>                                                                                                                                                                                                                                                                                                                                                                                                                                                |                            |                  |                            |                  |                            |                |
| 1                                                                                                                                                                                                                                                                                                                                                                                                                                                              | Reference                  |                  | Reference                  |                  | Reference                  |                |
| 2                                                                                                                                                                                                                                                                                                                                                                                                                                                              | 1.05 (0.94 to 1.18)        | 0.367            | 1.05 (0.94 to 1.17)        | 0.376            | 0.95 (0.85 to 1.06)        | 0.384          |
| 3                                                                                                                                                                                                                                                                                                                                                                                                                                                              | 1.46 (1.25 to 1.70)        | <0.001           | 1.34 (1.16 to 1.55)        | <0.001           | 1.12 (0.96 to 1.32)        | 0.147          |
| 4                                                                                                                                                                                                                                                                                                                                                                                                                                                              | 1.65 (1.40 to 1.95)        | <0.001           | 1.43 (1.22 to 1.68)        | <0.001           | 1.12 (0.93 to 1.35)        | 0.241          |
| <i>NO<sub>2</sub> (IQR)</i>                                                                                                                                                                                                                                                                                                                                                                                                                                    | <i>1.44 (1.31 to 1.58)</i> | <i>&lt;0.001</i> | <i>1.27 (1.16 to 1.39)</i> | <i>&lt;0.001</i> | <i>1.12 (1.00 to 1.25)</i> | <i>0.047</i>   |
| PM <sub>2.5</sub>                                                                                                                                                                                                                                                                                                                                                                                                                                              |                            |                  |                            |                  |                            |                |
| 1                                                                                                                                                                                                                                                                                                                                                                                                                                                              | Reference                  |                  | Reference                  |                  | Reference                  |                |
| 2                                                                                                                                                                                                                                                                                                                                                                                                                                                              | 1.13 (0.97 to 1.32)        | 0.121            | 1.16 (1.00 to 1.35)        | 0.052            | 1.10 (0.95 to 1.28)        | 0.206          |
| 3                                                                                                                                                                                                                                                                                                                                                                                                                                                              | 1.41 (1.18 to 1.69)        | <0.001           | 1.44 (1.21 to 1.72)        | <0.001           | 1.29 (1.08 to 1.54)        | 0.006          |
| 4                                                                                                                                                                                                                                                                                                                                                                                                                                                              | 1.75 (1.43 to 2.15)        | <0.001           | 1.65 (1.35 to 2.01)        | <0.001           | 1.44 (1.17 to 1.76)        | <0.001         |
| <i>PM<sub>2.5</sub> (IQR)</i>                                                                                                                                                                                                                                                                                                                                                                                                                                  | <i>1.13 (1.07 to 1.21)</i> | <i>&lt;0.001</i> | <i>1.09 (1.03 to 1.16)</i> | <i>0.003</i>     | <i>1.06 (1.00 to 1.12)</i> | <i>0.062</i>   |
| PM <sub>10</sub>                                                                                                                                                                                                                                                                                                                                                                                                                                               |                            |                  |                            |                  |                            |                |
| 1                                                                                                                                                                                                                                                                                                                                                                                                                                                              | Reference                  |                  | Reference                  |                  | Reference                  |                |
| 2                                                                                                                                                                                                                                                                                                                                                                                                                                                              | 0.99 (0.87 to 1.12)        | 0.878            | 0.92 (0.82 to 1.04)        | 0.192            | 0.90 (0.80 to 1.02)        | 0.106          |
| 3                                                                                                                                                                                                                                                                                                                                                                                                                                                              | 1.41 (1.19 to 1.67)        | <0.001           | 1.21 (1.03 to 1.42)        | 0.021            | 1.12 (0.95 to 1.32)        | 0.174          |
| 4                                                                                                                                                                                                                                                                                                                                                                                                                                                              | 1.54 (1.27 to 1.86)        | <0.001           | 1.27 (1.06 to 1.52)        | 0.008            | 1.11 (0.93 to 1.34)        | 0.251          |
| <i>PM<sub>10</sub> (IQR)</i>                                                                                                                                                                                                                                                                                                                                                                                                                                   | <i>1.27 (1.15 to 1.40)</i> | <i>&lt;0.001</i> | <i>1.17 (1.07 to 1.28)</i> | <i>0.001</i>     | <i>1.09 (1.00 to 1.20)</i> | <i>0.059</i>   |
| CMHT=community mental health team; CI=confidence interval; IQR=interquartile range; IRR=incident risk ratio; NO <sub>2</sub> =nitrogen dioxide; PM <sub>2.5</sub> =particulate matter <2.5µm; PM <sub>10</sub> =particulate matter <10µm<br>Model 1: Season and year<br>Model 2: Model 1 + age, gender, ethnicity, marital status, comorbid mental health conditions<br>Model 3: Model 2 + neighbourhood deprivation, population density, social fragmentation |                            |                  |                            |                  |                            |                |

**Table S7.** To examine whether associations between air pollution exposure and number of CMHT events were modified by neighbourhood deprivation we included an interaction term with IMD in fully adjusted regression models (N=5024)

|                        | Year 1                 |                | Year 5                 |                | Year 9                 |                |
|------------------------|------------------------|----------------|------------------------|----------------|------------------------|----------------|
|                        | <i>IRR (95% CI)</i>    | <i>P value</i> | <i>IRR (95% CI)</i>    | <i>P value</i> | <i>IRR (95% CI)</i>    | <i>P value</i> |
| NO <sub>2</sub> *IMD   | 0.999 (0.995 to 1.003) | 0.674          | 0.998 (0.995 to 1.002) | 0.419          | 0.999 (0.996 to 1.002) | 0.548          |
| PM <sub>2.5</sub> *IMD | 0.999 (0.997 to 1.001) | 0.594          | 1.000 (0.998 to 1.001) | 0.675          | 1.000 (0.998 to 1.002) | 0.850          |
| PM <sub>10</sub> *IMD  | 1.000 (0.997 to 1.003) | 0.863          | 1.001 (0.998 to 1.004) | 0.544          | 1.14 (0.998 to 1.004)  | 0.526          |

CI=confidence interval; CMHT=community mental health team; IMD=Index of Multiple Deprivation; IRR=incident risk ratio; NO<sub>2</sub>=nitrogen dioxide; PM<sub>2.5</sub>=particulate matter <2.5µm; PM<sub>10</sub>=particulate matter <10µm  
Covariates: Season, year, age, gender, ethnicity, marital status, comorbid mental health conditions, population density, social fragmentation

**Table S8.** To examine whether associations between air pollution exposure and number of CMHT events were modified by borough we included an interaction term with borough in fully adjusted regression models (N=5024)

|                            | Year 1                     |                | Year 5                     |                | Year 9                     |                |
|----------------------------|----------------------------|----------------|----------------------------|----------------|----------------------------|----------------|
|                            | <i>IRR (95% CI)</i>        | <i>P value</i> | <i>IRR (95% CI)</i>        | <i>P value</i> | <i>IRR (95% CI)</i>        | <i>P value</i> |
| NO <sub>2</sub> *Borough   |                            |                |                            |                |                            |                |
| <i>Southwark</i>           | Reference                  |                | Reference                  |                | Reference                  |                |
| <i>Lambeth</i>             | 1.10 (0.97 to 1.24)        | 0.127          | 1.03 (0.92 to 1.16)        | 0.562          | 1.06 (0.95 to 1.19)        | 0.312          |
| <i>Lewisham</i>            | <b>1.21 (1.06 to 1.39)</b> | <b>0.005</b>   | <b>1.15 (1.01 to 1.31)</b> | <b>0.036</b>   | <b>1.16 (1.02 to 1.33)</b> | <b>0.020</b>   |
| <i>Croydon</i>             | 1.10 (0.98 to 1.24)        | 0.096          | 1.06 (0.95 to 1.19)        | 0.276          | 1.07 (0.96 to 1.19)        | 0.207          |
| PM <sub>2.5</sub> *Borough |                            |                |                            |                |                            |                |
| <i>Southwark</i>           | Reference                  |                | Reference                  |                | Reference                  |                |
| <i>Lambeth</i>             | 1.02 (0.96 to 1.09)        | 0.508          | 1.02 (0.96 to 1.09)        | 0.475          | 1.03 (0.97 to 1.10)        | 0.299          |
| <i>Lewisham</i>            | 1.03 (0.96 to 1.11)        | 0.402          | 1.04 (0.97 to 1.11)        | 0.267          | 1.04 (0.97 to 1.12)        | 0.212          |
| <i>Croydon</i>             | <b>1.07 (1.00 to 1.13)</b> | <b>0.037</b>   | 1.05 (0.99 to 1.12)        | 0.078          | 1.05 (0.99 to 1.12)        | 0.070          |
| PM <sub>10</sub> *Borough  |                            |                |                            |                |                            |                |
| <i>Southwark</i>           | Reference                  |                | Reference                  |                | Reference                  |                |
| <i>Lambeth</i>             | 1.09 (0.98 to 1.21)        | 0.094          | 1.05 (0.95 to 1.16)        | 0.320          | 1.06 (0.96 to 1.17)        | 0.210          |
| <i>Lewisham</i>            | <b>1.12 (1.00 to 1.25)</b> | <b>0.044</b>   | 1.09 (0.98 to 1.21)        | 0.123          | 1.09 (0.98 to 1.21)        | 0.102          |
| <i>Croydon</i>             | 1.03 (1.00 to 1.25)        | 0.536          | 1.00 (0.91 to 1.09)        | 0.996          | 1.00 (0.92 to 1.10)        | 0.925          |

CI=confidence interval; CMHT=community mental health team; IRR=incident risk ratio; NO<sub>2</sub>=nitrogen dioxide; PM<sub>2.5</sub>=particulate matter <2.5µm; PM<sub>10</sub>=particulate matter <10µm  
Covariates: Season, year, age, gender, ethnicity, marital status, comorbid mental health conditions, neighbourhood deprivation, population density, social fragmentation

| <b>Table S9. Associations between air pollution and CMHT events stratified by residential Borough (N=5024)</b>                                                                                                                                                                                                                                                                               |                     |                |                     |                |                     |                |
|----------------------------------------------------------------------------------------------------------------------------------------------------------------------------------------------------------------------------------------------------------------------------------------------------------------------------------------------------------------------------------------------|---------------------|----------------|---------------------|----------------|---------------------|----------------|
|                                                                                                                                                                                                                                                                                                                                                                                              | Year 1              |                | Year 5              |                | Year 9              |                |
|                                                                                                                                                                                                                                                                                                                                                                                              | <i>IRR (95% CI)</i> | <i>P value</i> | <i>IRR (95% CI)</i> | <i>P value</i> | <i>IRR (95% CI)</i> | <i>P value</i> |
| <b>Southwark (N=893)</b>                                                                                                                                                                                                                                                                                                                                                                     |                     |                |                     |                |                     |                |
| <i>NO<sub>2</sub></i>                                                                                                                                                                                                                                                                                                                                                                        | 1.00 (0.84 to 1.18) | 0.966          | 1.05 (0.89 to 1.23) | 0.573          | 1.03 (0.88 to 1.21) | 0.665          |
| <i>PM<sub>2.5</sub></i>                                                                                                                                                                                                                                                                                                                                                                      | 0.97 (0.88 to 1.06) | 0.517          | 0.95 (0.87 to 1.04) | 0.255          | 0.97 (0.89 to 1.05) | 0.430          |
| <i>PM<sub>10</sub></i>                                                                                                                                                                                                                                                                                                                                                                       | 0.95 (0.83 to 1.10) | 0.515          | 0.94 (0.82 to 1.07) | 0.355          | 0.95 (0.83 to 1.08) | 0.447          |
| <b>Lambeth (N=1101)</b>                                                                                                                                                                                                                                                                                                                                                                      |                     |                |                     |                |                     |                |
| <i>NO<sub>2</sub></i>                                                                                                                                                                                                                                                                                                                                                                        | 1.17 (1.00 to 1.37) | 0.049          | 1.06 (0.91 to 1.24) | 0.416          | 1.09 (0.93 to 1.26) | 0.274          |
| <i>PM<sub>2.5</sub></i>                                                                                                                                                                                                                                                                                                                                                                      | 1.14 (1.05 to 1.24) | 0.002          | 1.11 (1.02 to 1.20) | 0.011          | 1.11 (1.02 to 1.20) | 0.011          |
| <i>PM<sub>10</sub></i>                                                                                                                                                                                                                                                                                                                                                                       | 1.18 (1.04 to 1.34) | 0.010          | 1.15 (1.02 to 1.30) | 0.026          | 1.15 (1.02 to 1.29) | 0.025          |
| <b>Lewisham (N=929)</b>                                                                                                                                                                                                                                                                                                                                                                      |                     |                |                     |                |                     |                |
| <i>NO<sub>2</sub></i>                                                                                                                                                                                                                                                                                                                                                                        | 1.21 (0.95 to 1.52) | 0.120          | 1.31 (1.06 to 1.63) | 0.013          | 1.33 (1.08 to 1.65) | 0.007          |
| <i>PM<sub>2.5</sub></i>                                                                                                                                                                                                                                                                                                                                                                      | 1.17 (1.05 to 1.31) | 0.005          | 1.20 (1.08 to 1.32) | 0.001          | 1.20 (1.09 to 1.32) | <0.001         |
| <i>PM<sub>10</sub></i>                                                                                                                                                                                                                                                                                                                                                                       | 1.17 (0.98 to 1.39) | 0.088          | 1.23 (1.04 to 1.45) | 0.014          | 1.24 (1.06 to 1.45) | 0.008          |
| <b>Croydon (N=2101)</b>                                                                                                                                                                                                                                                                                                                                                                      |                     |                |                     |                |                     |                |
| <i>NO<sub>2</sub></i>                                                                                                                                                                                                                                                                                                                                                                        | 1.29 (1.12 to 1.48) | <0.001         | 1.25 (1.09 to 1.43) | 0.001          | 1.24 (1.08 to 1.41) | 0.002          |
| <i>PM<sub>2.5</sub></i>                                                                                                                                                                                                                                                                                                                                                                      | 1.16 (1.09 to 1.24) | <0.001         | 1.13 (1.06 to 1.20) | <0.001         | 1.13 (1.06 to 1.20) | <0.001         |
| <i>PM<sub>10</sub></i>                                                                                                                                                                                                                                                                                                                                                                       | 1.21 (1.09 to 1.35) | <0.001         | 1.18 (1.07 to 1.31) | 0.001          | 1.19 (1.08 to 1.31) | 0.001          |
| CI=confidence interval; CMHT=community mental health teams; IRR=incident risk ratio; NO <sub>2</sub> =nitrogen dioxide; PM <sub>2.5</sub> =particulate matter <2.5µm; PM <sub>10</sub> =particulate matter <10µm<br>Covariates: Season, year, age, gender, ethnicity, marital status, comorbid mental health conditions, neighbourhood deprivation; population density, social fragmentation |                     |                |                     |                |                     |                |

| <b>Table S10.</b> Two-pollutant models of the association between air pollution exposure and number of CMHT events                                                                                                                                                                                                                                                                                                 |                       |                         |                        |
|--------------------------------------------------------------------------------------------------------------------------------------------------------------------------------------------------------------------------------------------------------------------------------------------------------------------------------------------------------------------------------------------------------------------|-----------------------|-------------------------|------------------------|
| <i>Co-pollutant confounder added to Model 3</i>                                                                                                                                                                                                                                                                                                                                                                    |                       |                         |                        |
| <b>Year 1</b>                                                                                                                                                                                                                                                                                                                                                                                                      |                       |                         |                        |
|                                                                                                                                                                                                                                                                                                                                                                                                                    | <i>NO<sub>2</sub></i> | <i>PM<sub>2.5</sub></i> | <i>PM<sub>10</sub></i> |
|                                                                                                                                                                                                                                                                                                                                                                                                                    | <i>IRR (95% CI)</i>   | <i>IRR (95% CI)</i>     | <i>IRR (95% CI)</i>    |
| <b>CMHT events</b>                                                                                                                                                                                                                                                                                                                                                                                                 |                       |                         |                        |
| NO <sub>2</sub>                                                                                                                                                                                                                                                                                                                                                                                                    | -                     | 1.07 (0.97 to 1.19)     | 1.11 (0.99 to 1.24)    |
| PM <sub>2.5</sub>                                                                                                                                                                                                                                                                                                                                                                                                  | 1.08* (1.02 to 1.14)  | -                       | 1.17 (1.05 to 1.30)*   |
| PM <sub>10</sub>                                                                                                                                                                                                                                                                                                                                                                                                   | 1.08 (0.98 to 1.18)   | 0.92 (0.78 to 1.09)     | -                      |
| <b>Year 5</b>                                                                                                                                                                                                                                                                                                                                                                                                      |                       |                         |                        |
|                                                                                                                                                                                                                                                                                                                                                                                                                    | <i>IRR (95% CI)</i>   | <i>IRR (95% CI)</i>     | <i>IRR (95% CI)</i>    |
| NO <sub>2</sub>                                                                                                                                                                                                                                                                                                                                                                                                    | -                     | 1.11 (1.01 to 1.22)*    | 1.13 (1.01 to 1.25)*   |
| PM <sub>2.5</sub>                                                                                                                                                                                                                                                                                                                                                                                                  | 1.05 (1.00 to 1.11)*  | -                       | 1.09 (0.98 to 1.21)    |
| PM <sub>10</sub>                                                                                                                                                                                                                                                                                                                                                                                                   | 1.06 (0.97 to 1.16)   | 1.01 (0.86 to 1.18)     | -                      |
| <b>Year 9</b>                                                                                                                                                                                                                                                                                                                                                                                                      |                       |                         |                        |
|                                                                                                                                                                                                                                                                                                                                                                                                                    | <i>IRR (95% CI)</i>   | <i>IRR (95% CI)</i>     | <i>IRR (95% CI)</i>    |
| NO <sub>2</sub>                                                                                                                                                                                                                                                                                                                                                                                                    | -                     | 1.11 (1.00 to 1.22)*    | 1.12 (1.01 to 1.25)*   |
| PM <sub>2.5</sub>                                                                                                                                                                                                                                                                                                                                                                                                  | 1.06 (1.00 to 1.11)*  | -                       | 1.09 (0.99 to 1.21)    |
| PM <sub>10</sub>                                                                                                                                                                                                                                                                                                                                                                                                   | 1.06 (0.97 to 1.16)   | 1.00 (0.86 to 1.17)     | -                      |
| CI=confidence interval; CMHT=community mental health team; IRR=incident risk ratio; NO <sub>2</sub> =nitrogen dioxide; PM <sub>2.5</sub> =particulate matter <2.5µm; PM <sub>10</sub> =particulate matter <10µm<br>Covariates: Season, year, age, gender, ethnicity, marital status, comorbid mental health conditions, neighbourhood deprivation, population density, social fragmentation<br>*p<0.005; **p<0.001 |                       |                         |                        |

| <b>Table S11. Correlation matrix of measures of air pollution (N=5024, Pearson correlations)</b>     |                                          |                   |                  |
|------------------------------------------------------------------------------------------------------|------------------------------------------|-------------------|------------------|
| <b>Environmental exposure</b>                                                                        | <b>Pearson correlation coefficients*</b> |                   |                  |
|                                                                                                      | NO <sub>2</sub>                          | PM <sub>2.5</sub> | PM <sub>10</sub> |
| NO <sub>2</sub> (µg/m <sup>3</sup> )                                                                 | 1.00                                     |                   |                  |
| PM <sub>2.5</sub> (µg/m <sup>3</sup> )                                                               | 0.581                                    | 1.00              |                  |
| PM <sub>10</sub> (µg/m <sup>3</sup> )                                                                | 0.690                                    | 0.863             | 1.00             |
| NO <sub>2</sub> =Nitrogen dioxide; PM=particulate matter<br>*All coefficients have a p-value <0.0001 |                                          |                   |                  |

| <b>Table S12.</b> Associations between air pollution exposure and number of CMHT events clustered by LSOA (random intercept) (N=5024)                                                                                                                                                                                                                                                                                                   |                     |                |                     |                |                     |                |
|-----------------------------------------------------------------------------------------------------------------------------------------------------------------------------------------------------------------------------------------------------------------------------------------------------------------------------------------------------------------------------------------------------------------------------------------|---------------------|----------------|---------------------|----------------|---------------------|----------------|
|                                                                                                                                                                                                                                                                                                                                                                                                                                         | Year 1              |                | Year 5              |                | Year 9              |                |
|                                                                                                                                                                                                                                                                                                                                                                                                                                         | <i>IRR (95% CI)</i> | <i>P value</i> | <i>IRR (95% CI)</i> | <i>P value</i> | <i>IRR (95% CI)</i> | <i>P value</i> |
| NO <sub>2</sub>                                                                                                                                                                                                                                                                                                                                                                                                                         | 1.17 (1.08 to 1.28) | <0.001         | 1.16 (1.07 to 1.26) | <0.001         | 1.16 (1.08 to 1.26) | <0.001         |
| PM <sub>2.5</sub>                                                                                                                                                                                                                                                                                                                                                                                                                       | 1.10 (1.05 to 1.15) | <0.001         | 1.08 (1.04 to 1.13) | <0.001         | 1.08 (1.04 to 1.13) | <0.001         |
| PM <sub>10</sub>                                                                                                                                                                                                                                                                                                                                                                                                                        | 1.13 (1.06 to 1.21) | <0.001         | 1.12 (1.05 to 1.19) | 0.001          | 1.12 (1.05 to 1.19) | <0.001         |
| CI=confidence interval; CMHT=community mental health team; IMD=Index of Multiple Deprivation; IRR=incident risk ratio; LSOA=lower-layer super output area; NO <sub>2</sub> =nitrogen dioxide; PM <sub>2.5</sub> =particulate matter <2.5µm; PM <sub>10</sub> =particulate matter <10µm<br>Covariates: Season, year, age, gender, ethnicity, marital status, comorbid mental health conditions, population density, social fragmentation |                     |                |                     |                |                     |                |

## References

- 1 Braithwaite I, Zhang S, Kirkbride JB, *et al.* Air Pollution (Particulate Matter) Exposure and Associations with Depression, Anxiety, Bipolar, Psychosis and Suicide Risk: A Systematic Review and Meta-Analysis. *Environ Health Perspect* 2019;**127**:126002. doi:10.1289/EHP4595
- 2 Daniels MJ, Dominici F, Samet JM, *et al.* Estimating Particulate Matter-Mortality Dose-Response Curves and Threshold Levels: An Analysis of Daily Time-Series for the 20 Largest US Cities. *American Journal of Epidemiology* 2000;**152**:397–406. doi:10.1093/aje/152.5.397
- 3 Mayor of London. Air pollution monitoring data in London: 2016 to 2020. Greater London Authority 2020. [https://www.london.gov.uk/sites/default/files/air\\_pollution\\_monitoring\\_data\\_in\\_london\\_2016\\_to\\_2020\\_feb2020.pdf](https://www.london.gov.uk/sites/default/files/air_pollution_monitoring_data_in_london_2016_to_2020_feb2020.pdf) (accessed 28 Feb 2023).
- 4 Department for Environment Food and Rural Affairs. National statistics: Air quality statistics. 2022. <https://www.gov.uk/government/statistics/air-quality-statistics> (accessed 28 Feb 2023).
- 5 World Health Organisation. WHO global air quality guidelines: particulate matter (PM2.5 and PM10), ozone, nitrogen dioxide, sulfur dioxide and carbon monoxide. 2021. <https://apps.who.int/iris/handle/10665/345334> (accessed 19 Apr 2022).
